# Supplementary material
Source: Copernicus journal article supplement (doi:10.5194/gmd-19-3551-2026)
Supplement: Supplementary file [file gmd-19-3551-2026-supplement-title-page.pdf › gmd-19-3551-2026-supplement-title-page.pdf]

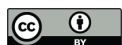

## *Supplement of*

# **The DLR CO<sub>2</sub>-equivalent estimator FlightClim v1.0: an easy-to-use estimation of per flight CO<sub>2</sub> and non-CO<sub>2</sub> climate effects**

**Hannes Bruder et al.**

*Correspondence to:* Hannes Bruder ([hannes.bruder@dlr.de](mailto:hannes.bruder@dlr.de))

- [gmd-19-3551-2026-supplement-title-page.pdf](#)
- [FlightClim\\_v1.01\\_MR.xlsm](#)
- [Supplementary\\_Materials\\_Bruder\\_et\\_al\\_2025.pdf](#)

The copyright of individual parts of the supplement might differ from the article licence.
